# Supplementary material
Source: PubMed Central journal article supplement (PMC9617783)

Figure S5. *GCKR*-rs1260326 TT variant impacts lipid accumulation and enhance inflammatory responses in sHLO

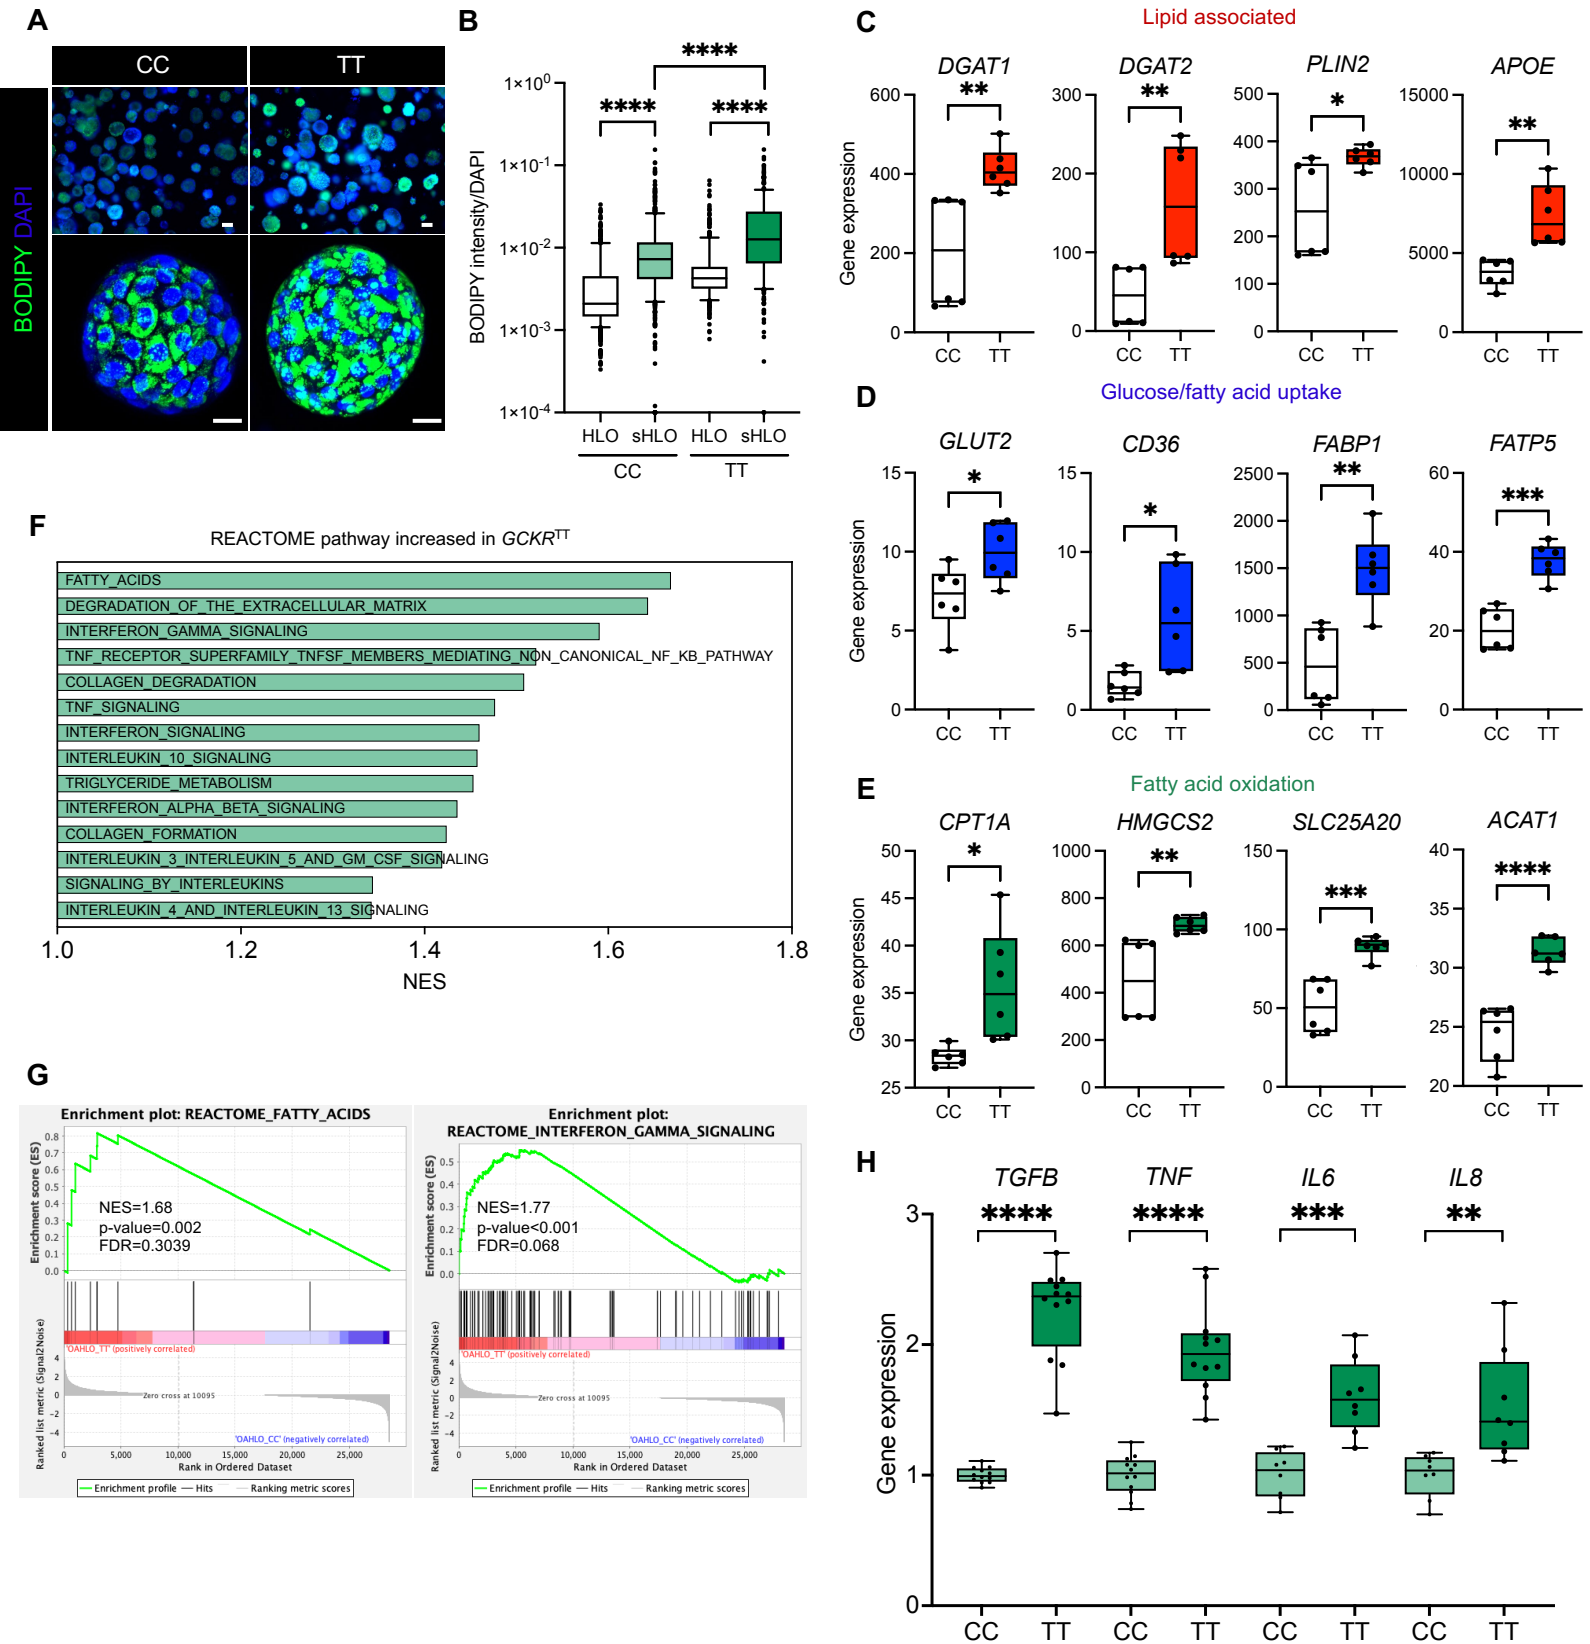

Supplement: NIHMS1838965-supplement-5.pdf [file NIHMS1838965-supplement-5.pdf]
