# Supplementary material
Source: PubMed Central journal article supplement (PMC9617783)

Figure S1. Development of human liver organoid panel from mixed foregut progenitors

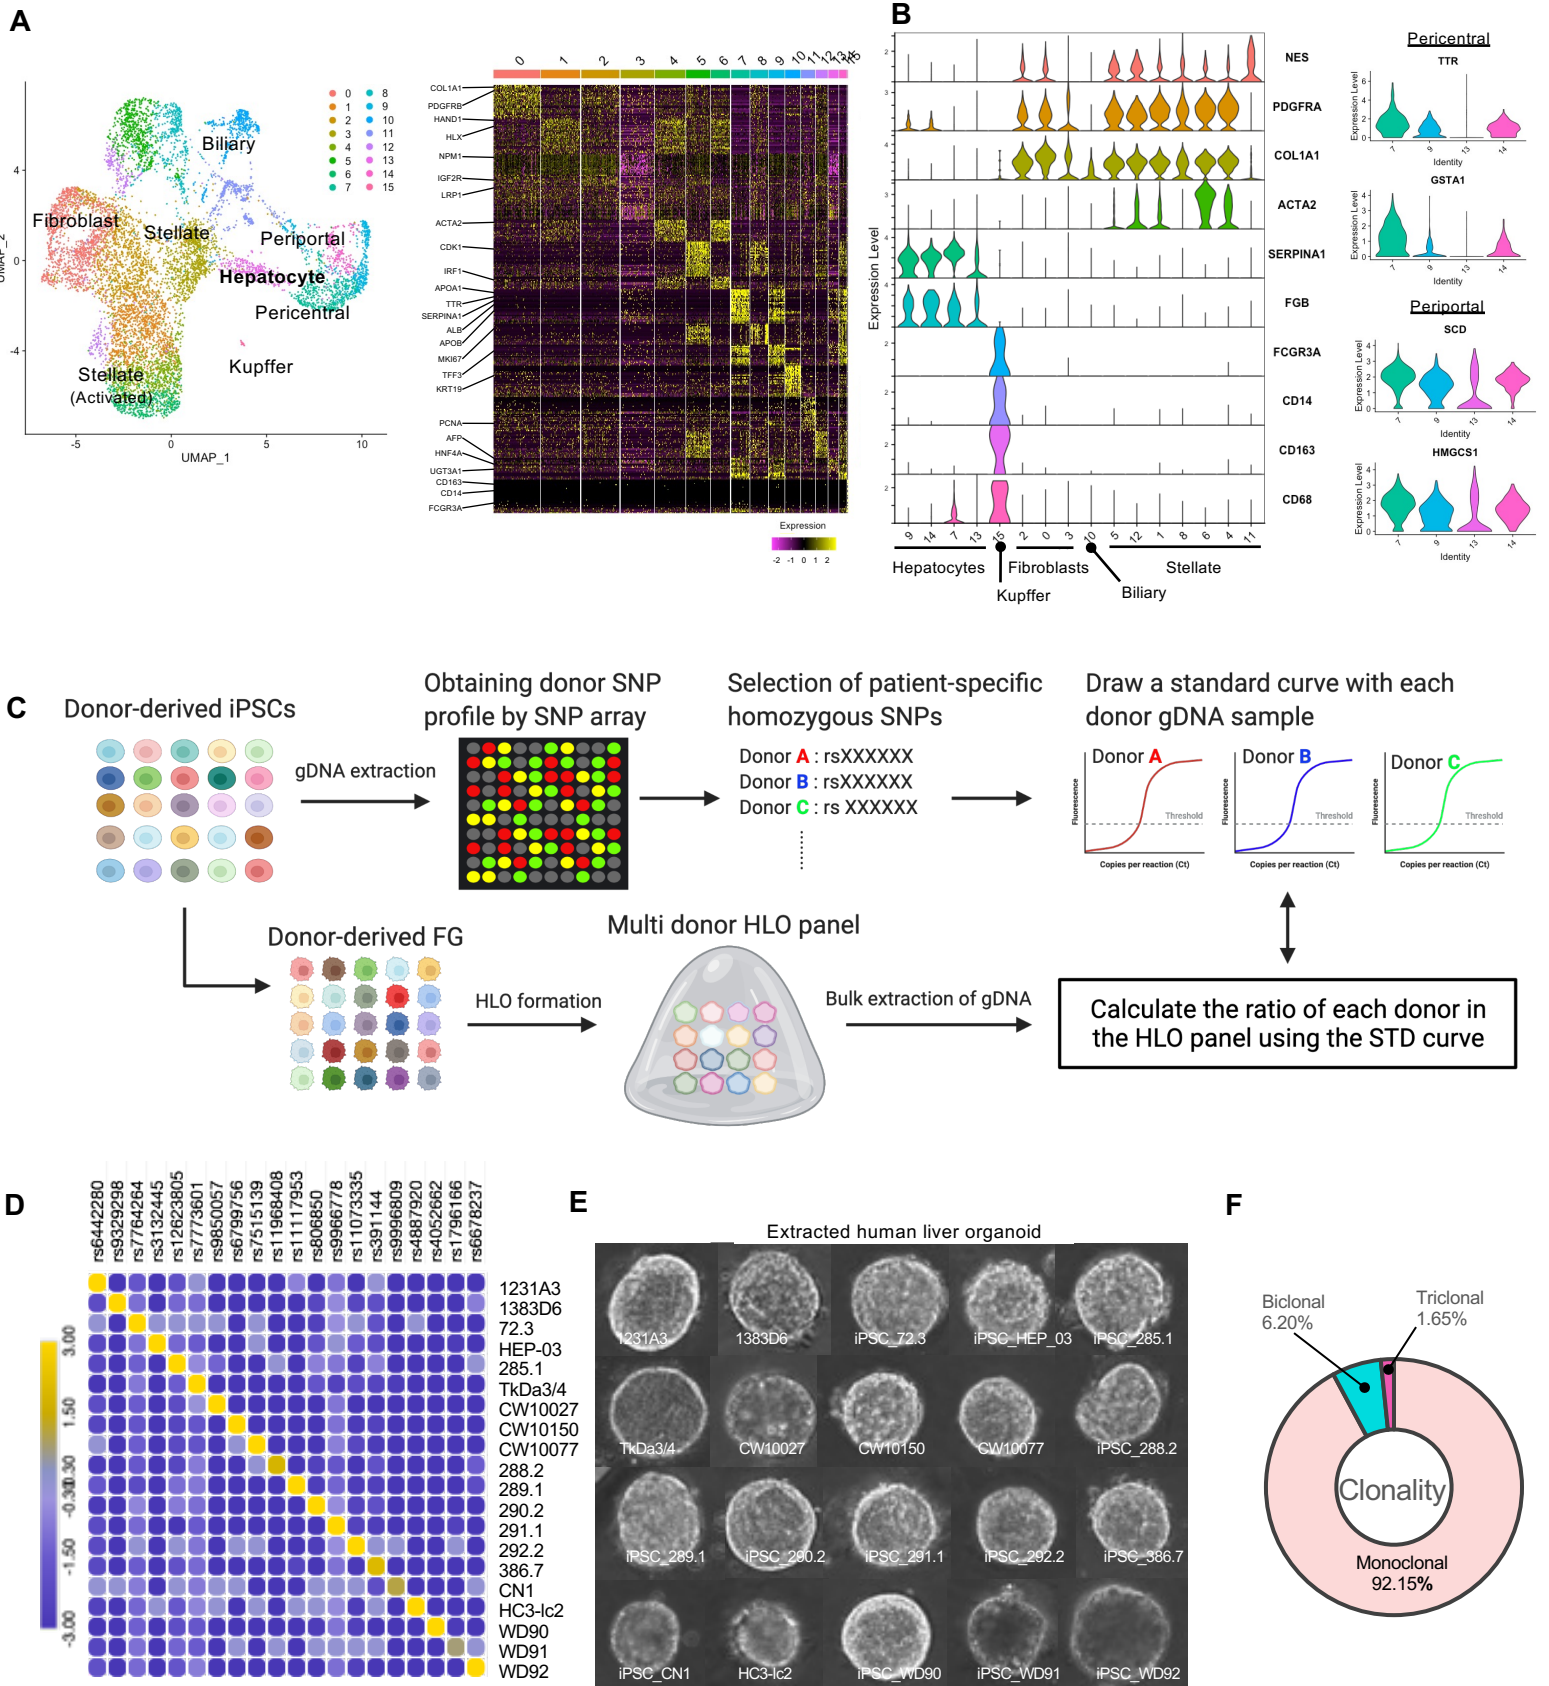

Supplement: NIHMS1838965-supplement-1.pdf [file NIHMS1838965-supplement-1.pdf]

Figure S2. Human organoid modeling of NAFLD-like phenotype induced by fatty acid loading

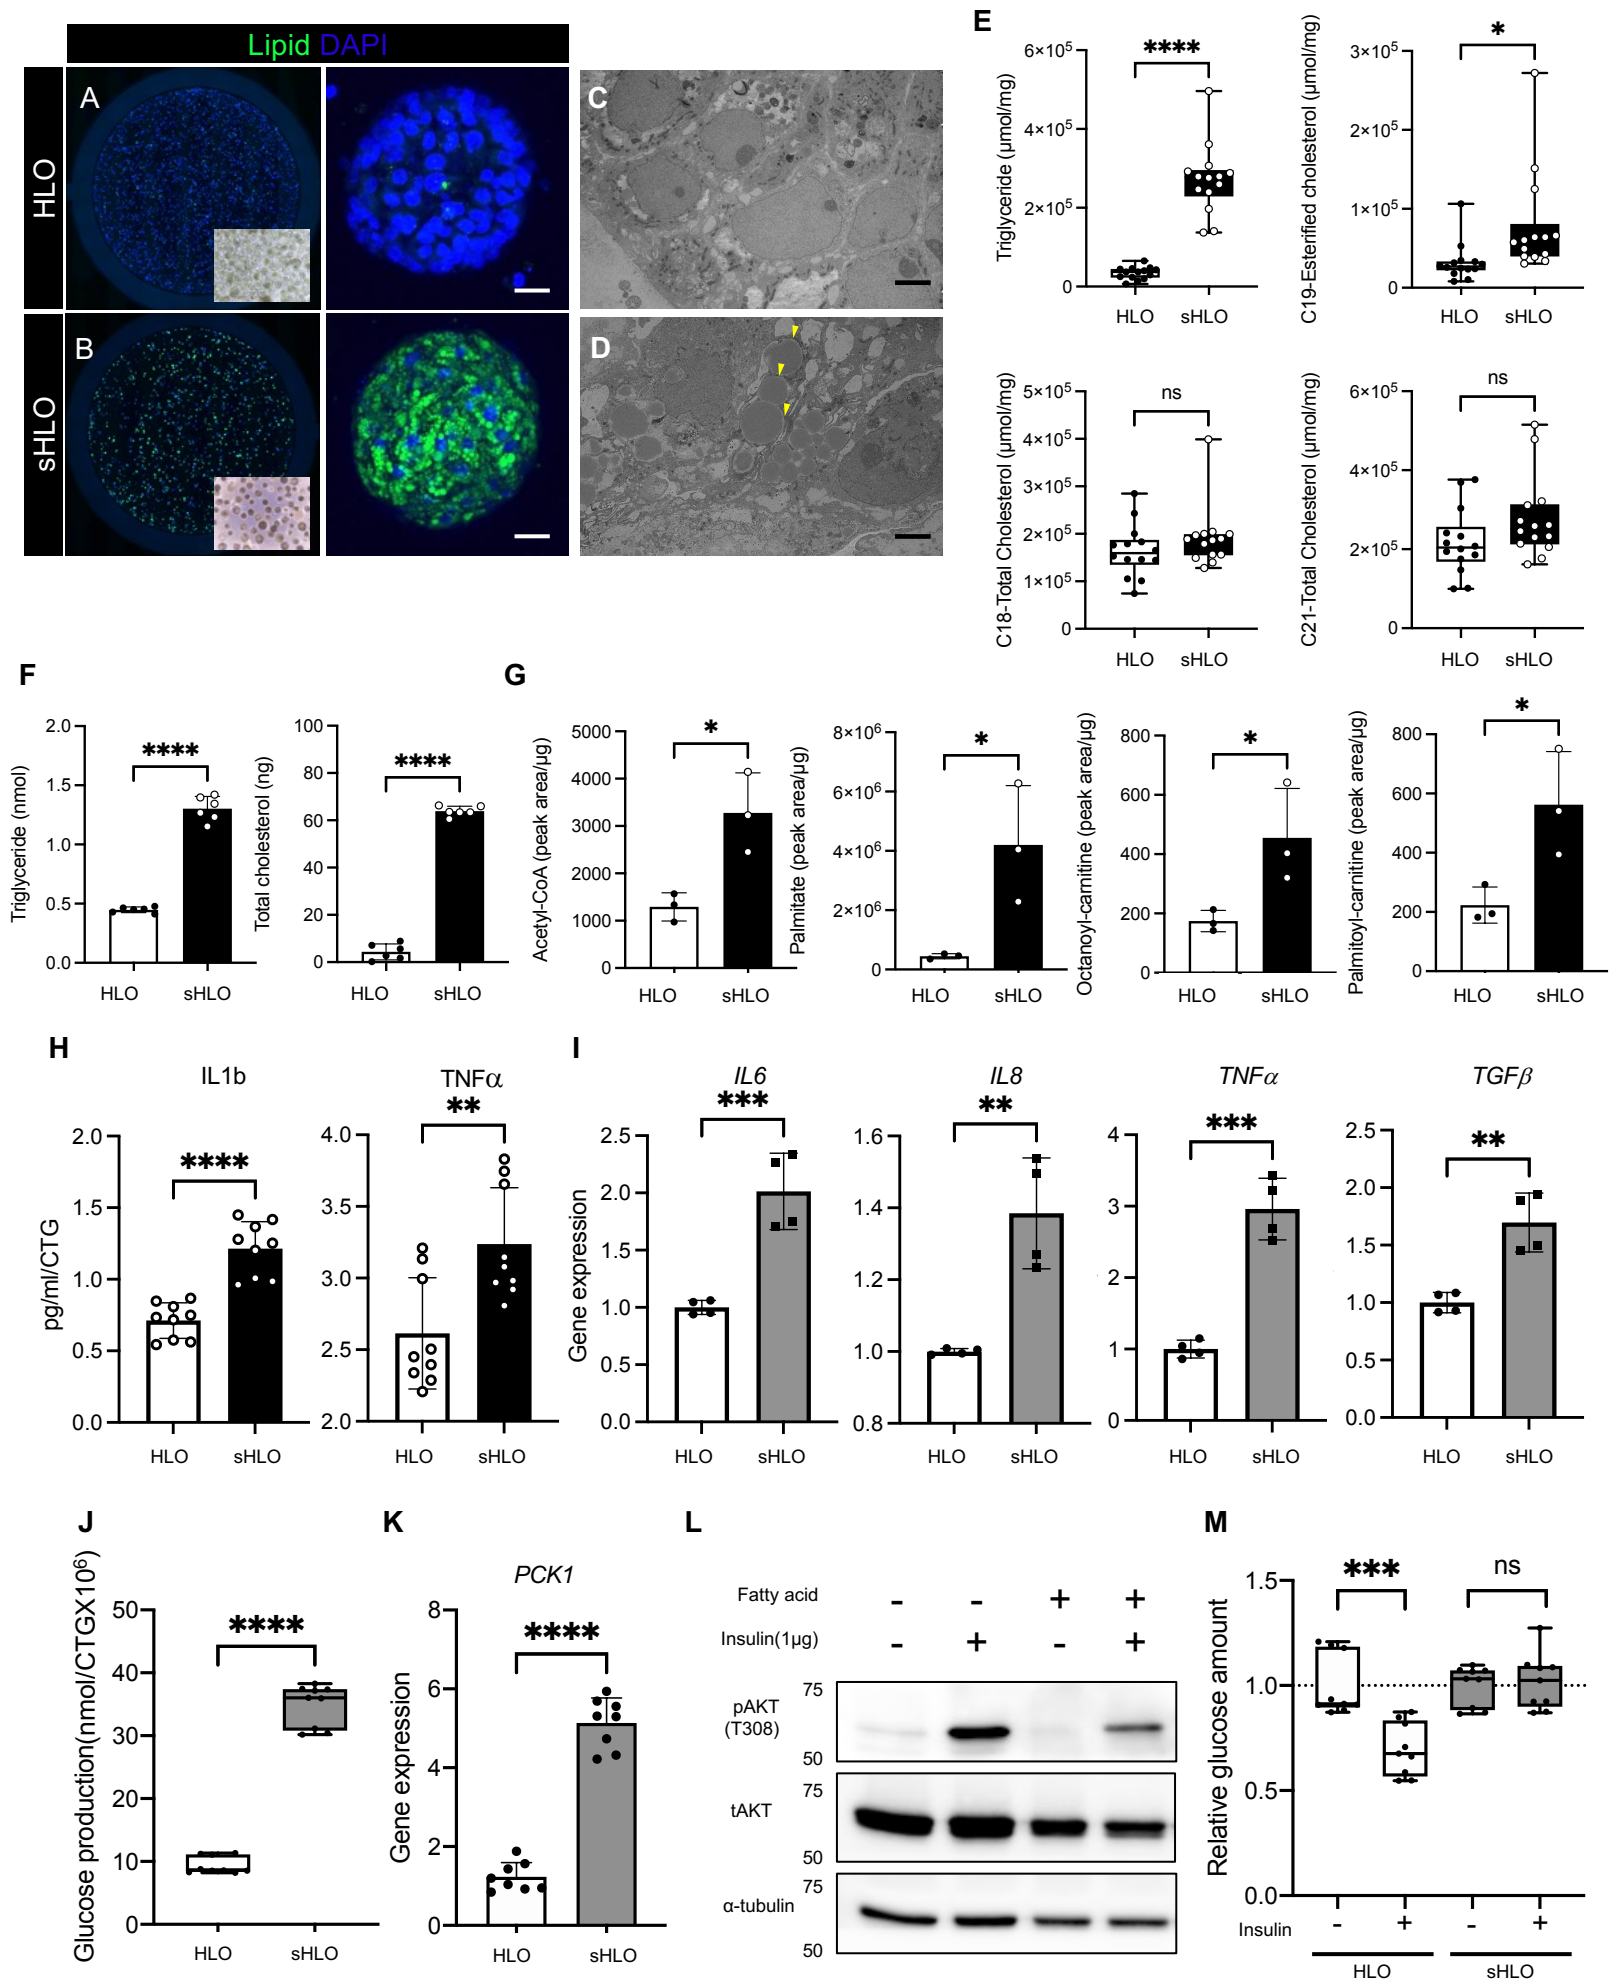

Supplement: NIHMS1838965-supplement-2.pdf [file NIHMS1838965-supplement-2.pdf]

Figure S3. Gene-targeting for *GCKR* rs1260326 locus in hiPSC

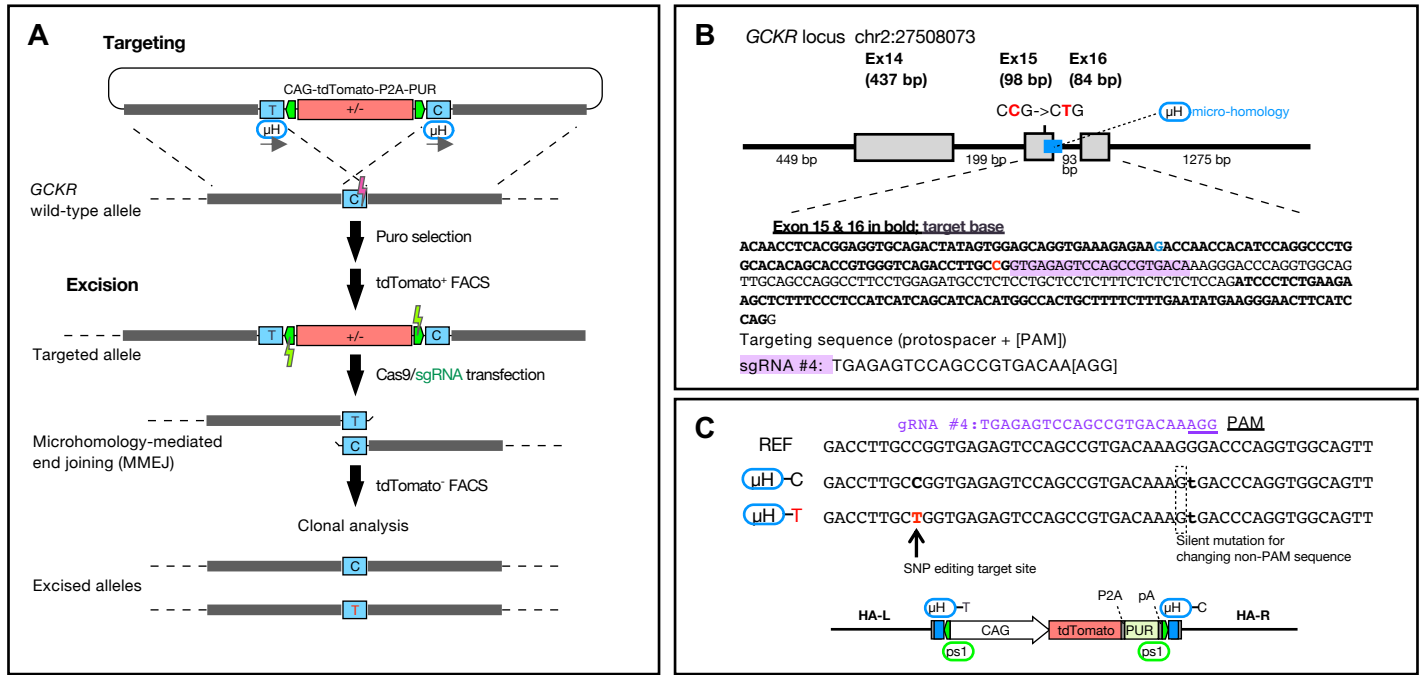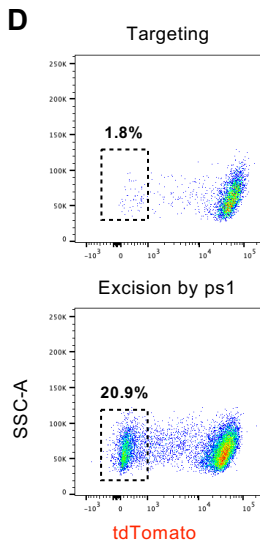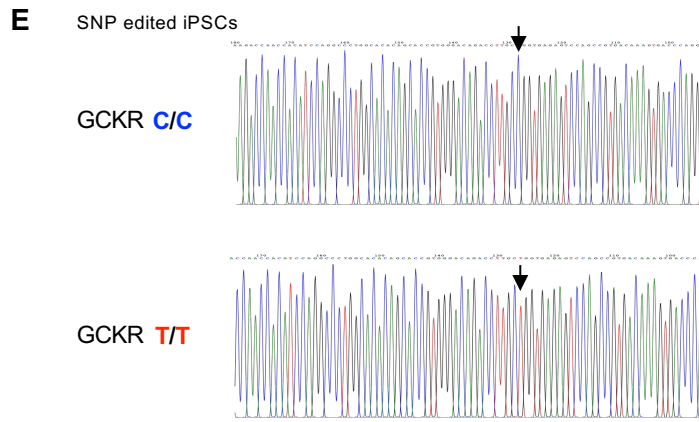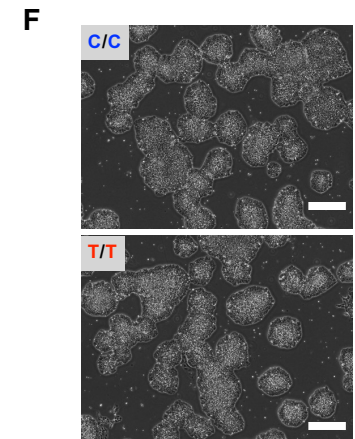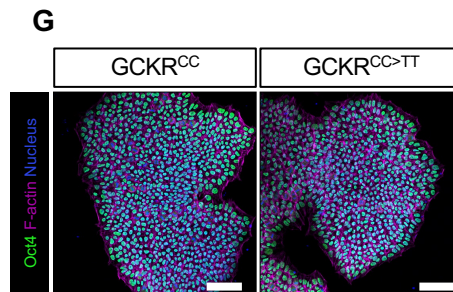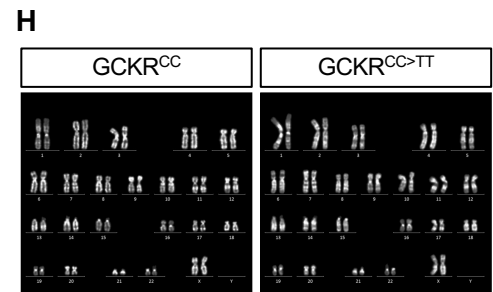

Supplement: NIHMS1838965-supplement-3.pdf [file NIHMS1838965-supplement-3.pdf]

Figure S4. Impact of *PNPLA3*-rs738409: C>G variant in NASH patients stratified by HbA1c levels

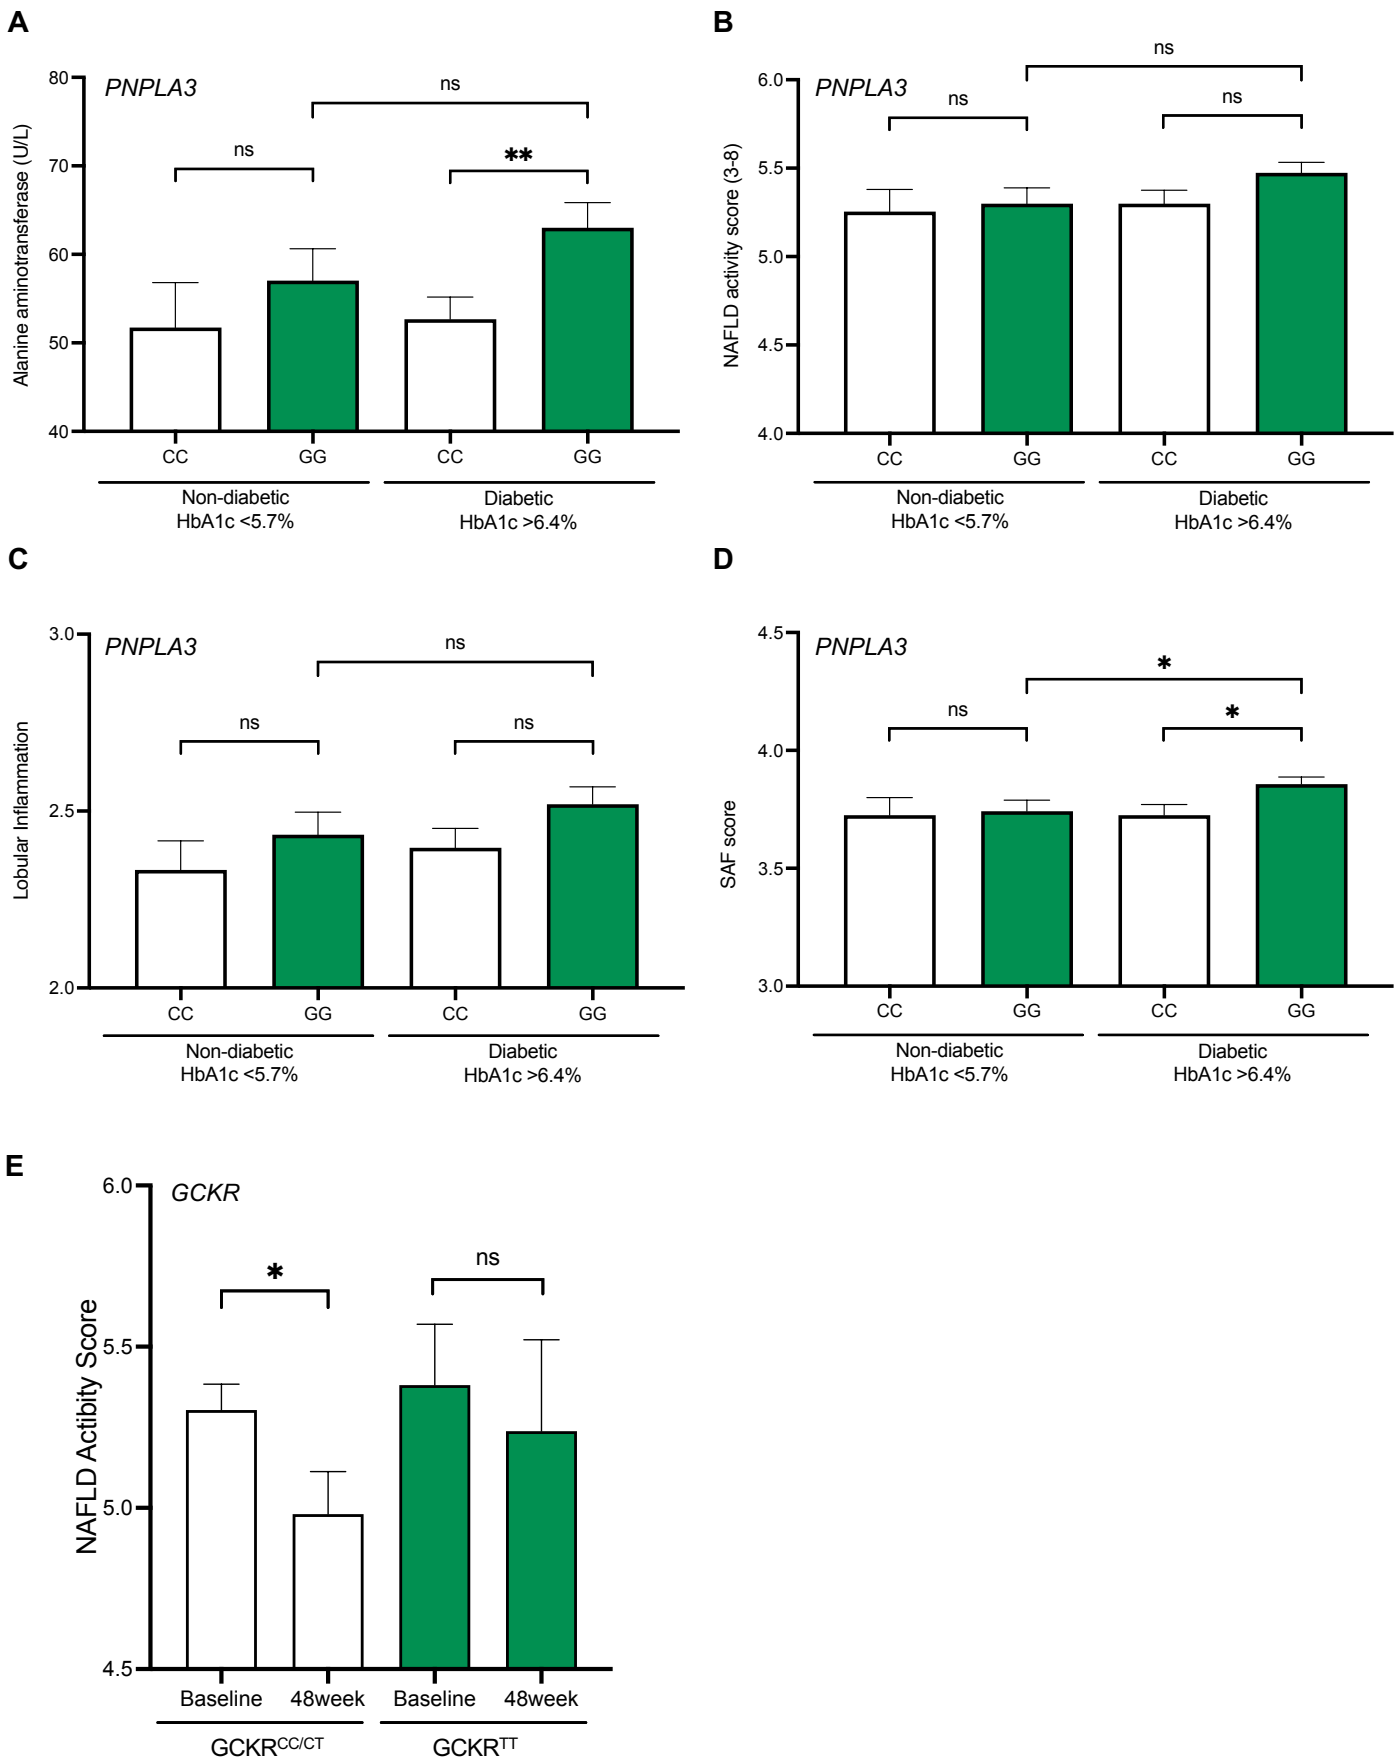

Supplement: NIHMS1838965-supplement-4.pdf [file NIHMS1838965-supplement-4.pdf]

Figure S6 Mitochondrial dysregulation is associated with GCKR-rs1260326 related metabolic assaults

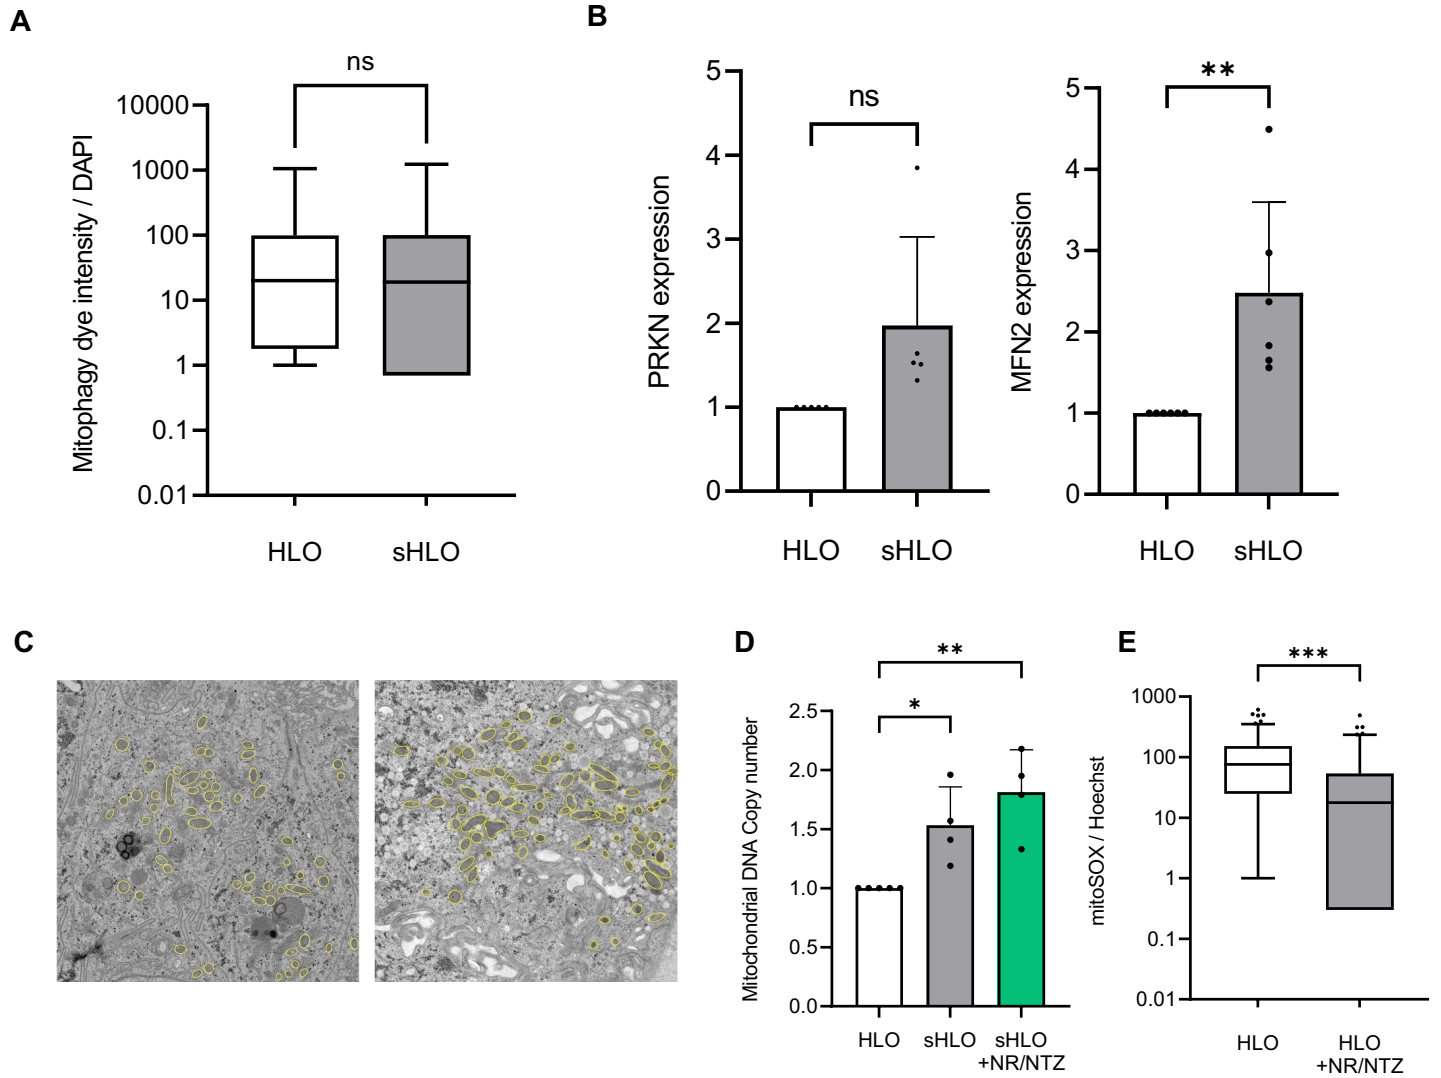

Supplement: NIHMS1838965-supplement-6.pdf [file NIHMS1838965-supplement-6.pdf]
